# Supplementary material for: Global synthesis of peer-reviewed articles reveals blind spots in climate impacts research
Source: Research Square preprint supplement (doi:10.21203/rs.3.rs-6095740/v1), 2025-04-14
Supplement: Supplementary file 1 [file 1c00ae5030bf25ed342fc592.pdf]

Appendix A    Supplementary information

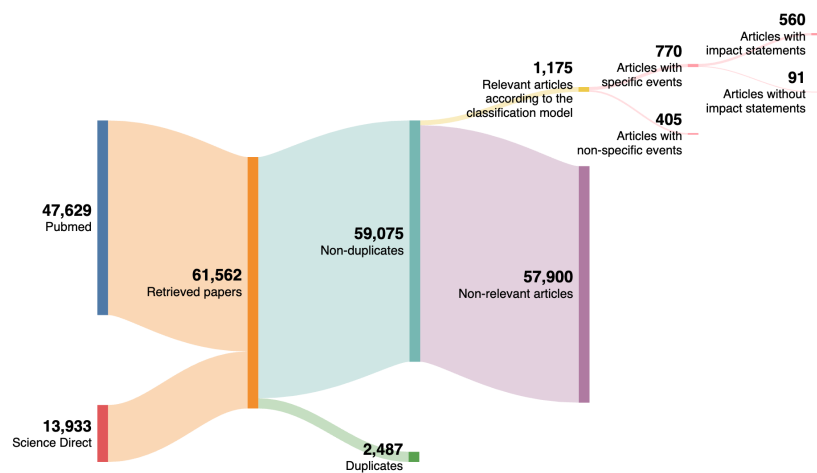

**Fig. A1** Process used to select relevant articles for the machine-learning synthesis.

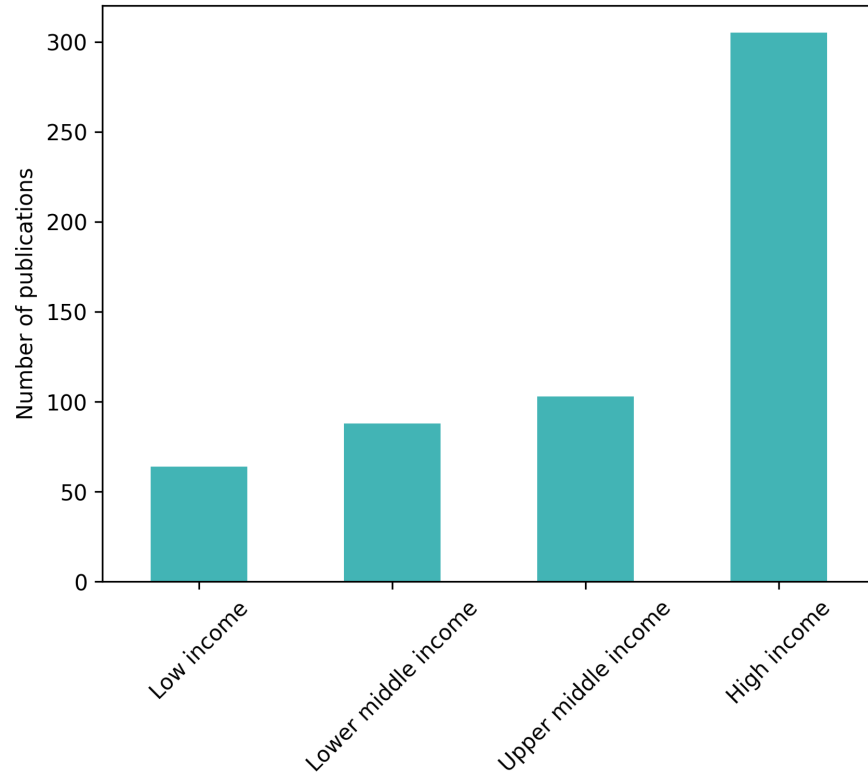

**Fig. A2** Number of impact-related articles by country income level in 2024. Income level was obtained from the World Bank [63]. Bars represent the estimated article count for each income group.

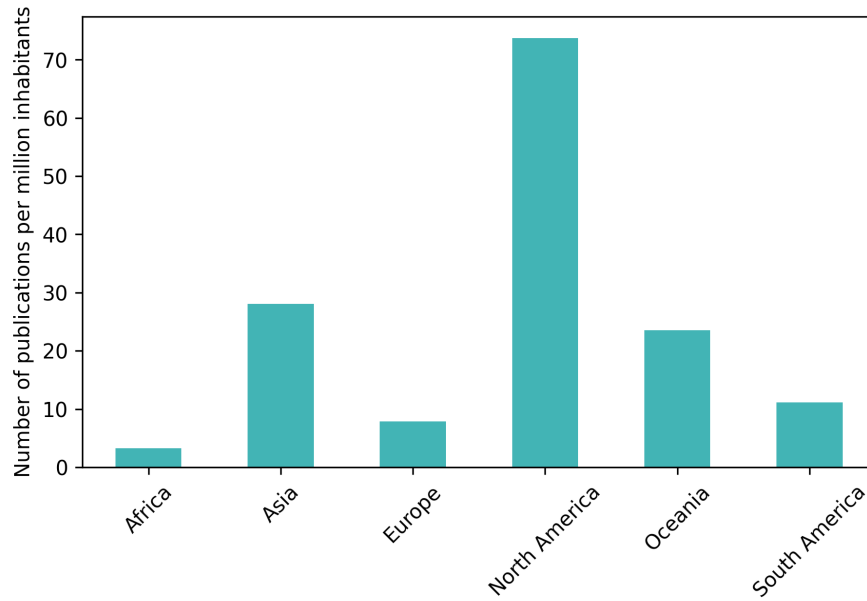

**Fig. A3** Number of articles reporting on the impacts of climate hazards per continent, scaled by population size in 2024. Population size was obtained from the World Bank Open Data [65]. Bars represent the estimated article count for each continent.

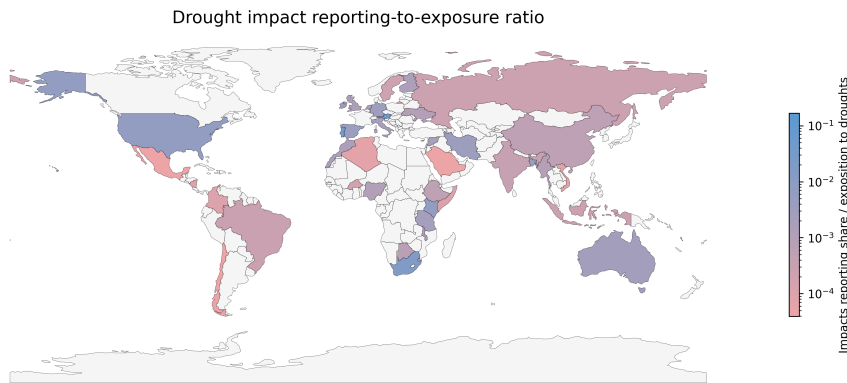

**Fig. A4** The map displays the ratio between drought impacts reporting share and exposure to droughts, showing the balance between the frequency of reported drought impacts and the actual exposure to droughts. Exposure to droughts is the geometric mean of the annually averaged population exposed to three levels of drought intensity-strong ( $SPEI \geq 2.0$ ), severe ( $SPEI \geq 2.5$ ), and extreme ( $SPEI \geq 3.0$ ). Positive values (blue shades) indicate higher reporting relative to exposure (likely over-reporting), while negative values (red shades) represent lower reporting relative to exposure (under-reporting). Darker colors indicate stronger discrepancies, with dark blue representing the highest levels of over-reporting and dark red representing the highest levels of under-reporting. Gray areas represent countries with no drought reporting.

1059  
1060  
1061  
1062  
1063  
1064  
1065  
1066  
1067  
1068  
1069  
1070  
1071

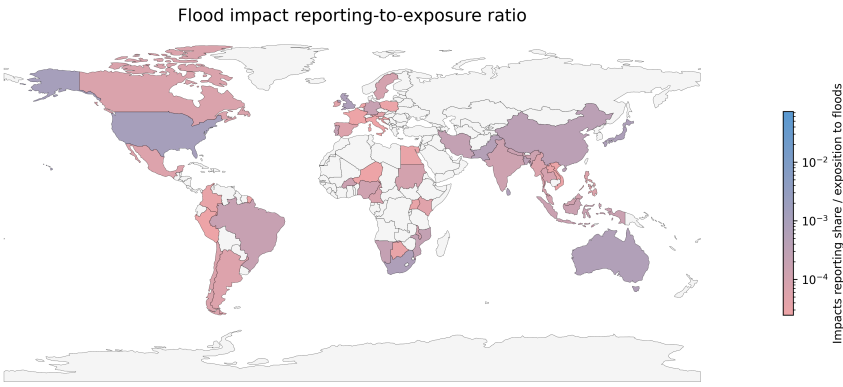

1072  
1073  
1074  
1075  
1076  
1077  
1078  
1079  
1080  
1081

**Fig. A5** The map displays the ratio between flood impacts reporting share and exposure to floods, showing the balance between the frequency of reported flood impacts and the actual exposure to riverine floods. Exposure to riverine floods is the geometric mean of the annually averaged population exposed to three levels of inundation intensity: strong intensity (inundation height  $\geq 0.5m$ ), severe intensity (inundation height  $\geq 1.0m$ ), and extreme intensity (inundation height  $\geq 2.0m$ ). Positive values (blue shades) indicate higher reporting relative to exposure (likely over-reporting), while negative values (red shades) represent lower reporting relative to exposure (under-reporting or low awareness). Darker colors indicate stronger discrepancies, with dark blue representing the highest levels of over-reporting and dark red representing the highest levels of under-reporting. Gray areas represent countries with no flood reporting.

1082  
1083  
1084  
1085  
1086  
1087  
1088  
1089  
1090  
1091  
1092  
1093  
1094  
1095

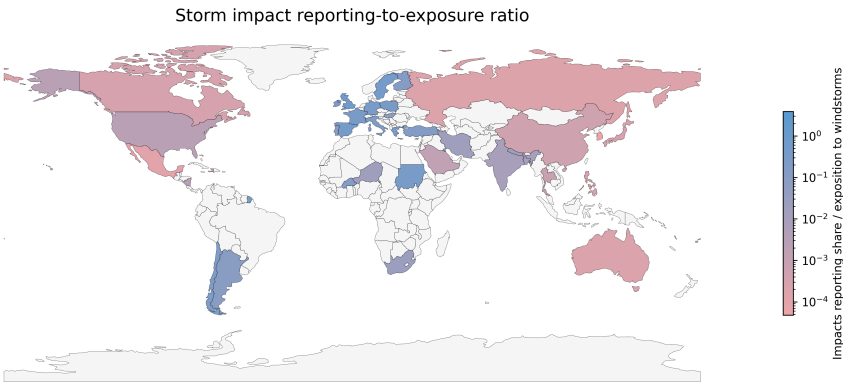

1096  
1097  
1098  
1099  
1100  
1101  
1102  
1103  
1104

**Fig. A6** The map displays the ratio between storm impacts reporting share and exposure to windstorms, showing the balance between the frequency of reported flood impacts and the actual exposure to riverine windstorms. Exposure to windstorms is the geometric mean of the annually averaged population exposed to three levels of wind intensity: strong intensity (sustained speeds 119 km/h or higher), severe intensity (sustained speeds 154 km/h or higher), and extreme intensity (sustained speeds 178 km/h or higher). Positive values (blue shades) indicate higher reporting relative to exposure (likely over-reporting), while negative values (red shades) represent lower reporting relative to exposure (under-reporting or low awareness). Darker colors indicate stronger discrepancies, with dark blue representing the highest levels of over-reporting and dark red representing the highest levels of under-reporting. Gray areas represent countries in our dataset with no reporting on storm impacts.

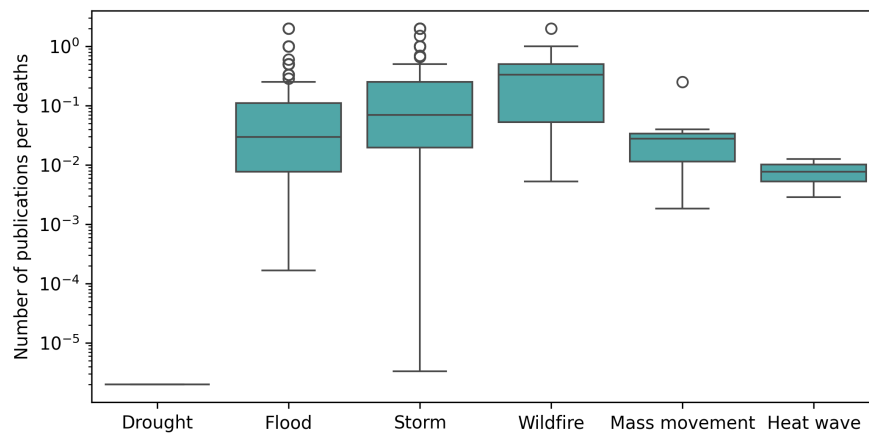

**Fig. A7** Logarithmic ratio of research publications to the number of fatalities according to different hazards, based on extreme events cross-referenced with EM-DAT records.

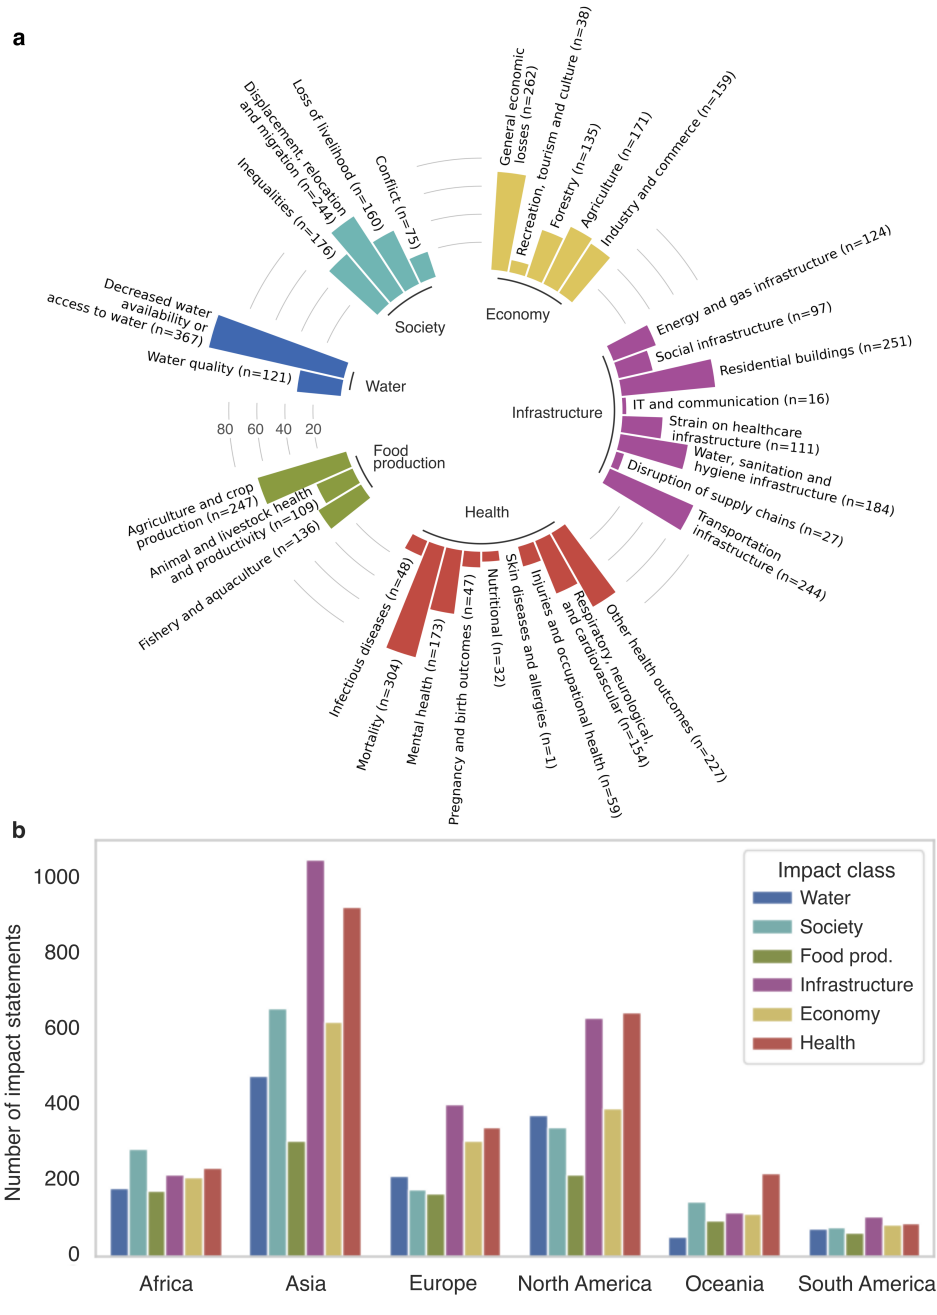

**Fig. A8** Number of impact statements (i.e., sentences identified and classified as reporting specific impacts) identified in the article full texts: (a) grouped into six main impact classes — Water, Society, Food production, Health, Infrastructure, and Economy — with further subdivisions; and (b) distributed by continent.

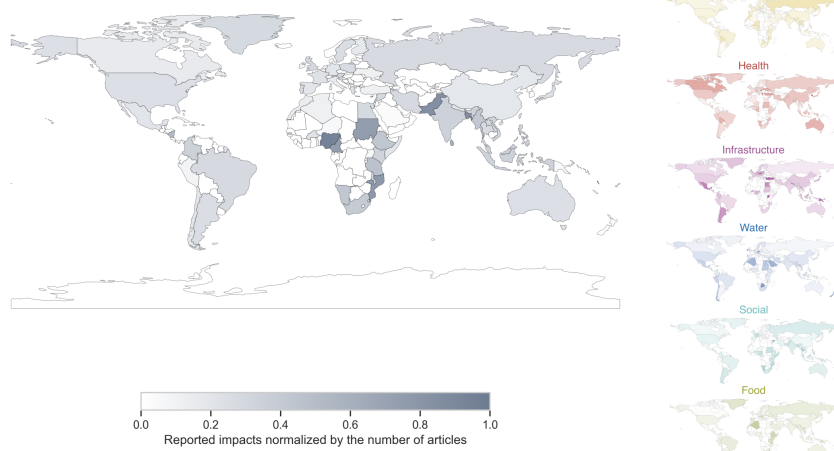

**Fig. A9** Impact statements normalized by the total number of published articles in each country.

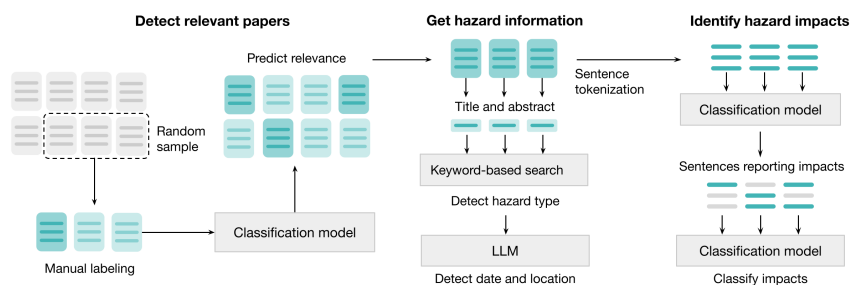

**Fig. A10** Detailed methodology description.

## Appendix B Extended methods

**Table B1** Typology of socioeconomic impacts.

| Impact class    | Subclass                                                   |
|-----------------|------------------------------------------------------------|
| Society         | Conflict (CFLC)                                            |
|                 | Loss of livelihood (LVLH)                                  |
|                 | Displacement, relocation, and migration (DISP)             |
| Water           | Inequality (INEQ)                                          |
|                 | Water availability or access to water (AVLB)               |
|                 | Water quality (QUAL)                                       |
| Food production | Agriculture and crop production (AGRI)                     |
|                 | Animal and livestock health and productivity (ANIM)        |
|                 | Fishery and aquaculture (FISH)                             |
| Health          | Infectious diseases (INFC)                                 |
|                 | Mortality (MORT)                                           |
|                 | Mental health (MIND)                                       |
|                 | Pregnancy and birth outcomes (PREG)                        |
|                 | Nutritional (NUTR)                                         |
|                 | Skin diseases and allergies (SKIN)                         |
|                 | Injuries and occupational health (OCC)                     |
|                 | Respiratory, neurological, and cardiovascular (RESP)       |
|                 | Other diseases/health outcomes (OTHER)                     |
|                 | Physical damage to transportation infrastructure (TRSP)    |
| Infrastructure  | Supply chains (SPPLY)                                      |
|                 | Water, sanitation, and hygiene infrastructure (SANIT)      |
|                 | Strain on healthcare infrastructure (STRAIN)               |
|                 | IT and communication (IT)                                  |
|                 | Residential buildings (RESI)                               |
|                 | Social and critical infrastructure (PUBL)                  |
|                 | Energy and gas infrastructure (ENER)                       |
|                 | Economic losses to industry and commerce (INDS)            |
|                 | Economic losses to agriculture (AGRC)                      |
|                 | Economic losses to forestry (FRST)                         |
| Economy         | Economic losses to recreation, tourism, and culture (RECR) |
|                 | General economic losses (ECOG)                             |



**Table B2** Classification evaluation of socioeconomic impacts.

| Impact class | Precision | Recall | F-score | Support |
|--------------|-----------|--------|---------|---------|
| CFLC         | 1.00      | 0.50   | 0.67    | 2       |
| LVLH         | 1.00      | 1.00   | 1.00    | 3       |
| DISP         | 0.83      | 1.00   | 0.91    | 5       |
| INEQ         | 0.80      | 1.00   | 0.89    | 4       |
| AVLB         | 0.90      | 0.90   | 0.90    | 10      |
| QUAL         | 1.00      | 0.50   | 0.67    | 2       |
| AGRI         | 1.00      | 0.90   | 0.95    | 10      |
| ANIM         | 1.00      | 1.00   | 1.00    | 6       |
| FISH         | 0.75      | 1.00   | 0.86    | 3       |
| INFC         | 0.50      | 1.00   | 0.67    | 2       |
| MORT         | 1.00      | 0.90   | 0.95    | 10      |
| MIND         | 0.89      | 1.00   | 0.94    | 8       |
| PREG         | 1.00      | 1.00   | 1.00    | 1       |
| NUTR         | 1.00      | 0.67   | 0.80    | 3       |
| SKIN         | 1.00      | 0.50   | 0.67    | 2       |
| OCC          | 1.00      | 0.60   | 0.75    | 5       |
| RESP         | 0.92      | 1.00   | 0.96    | 12      |
| OTHER        | 0.83      | 1.00   | 0.91    | 10      |
| TRSP         | 0.88      | 1.00   | 0.93    | 7       |
| SUPPLY       | 0.50      | 1.00   | 0.67    | 2       |
| SANIT        | 1.00      | 1.00   | 1.00    | 6       |
| STRAIN       | 1.00      | 1.00   | 1.00    | 9       |
| IT           | 1.00      | 0.50   | 0.67    | 2       |
| RESI         | 0.71      | 1.00   | 0.83    | 5       |
| PUBL         | 0.75      | 1.00   | 0.86    | 3       |
| ENER         | 0.78      | 1.00   | 0.88    | 7       |
| INDS         | 1.00      | 0.80   | 0.89    | 5       |
| AGRC         | 0.67      | 1.00   | 0.80    | 6       |
| FRST         | 1.00      | 1.00   | 1.00    | 2       |
| RECR         | 0.80      | 1.00   | 0.89    | 4       |
| ECOG         | 1.00      | 1.00   | 1.00    | 10      |
| micro avg    | 0.88      | 0.93   | 0.90    | 166     |
| macro avg    | 0.89      | 0.90   | 0.87    | 166     |
| weighted avg | 0.90      | 0.93   | 0.90    | 166     |
| samples avg  | 0.88      | 0.93   | 0.89    | 166     |

1335 **Table B3:** Hazard and impact query terms used to identify articles  
1336 reporting on the impacts of various climatological, hydrological,  
1337 and meteorological extreme events. Wildcard symbols (! and ?)  
1338 were included to capture variations in terminology and spelling.  
1339 The ! symbol allows for plural and variant endings (e.g. "flood" and  
1340 "floods", "fatality" and "fatalities"), while the ? symbol enables  
1341 single-character variations (e.g. "heatwave" and "heat wave") for  
1342 comprehensive search coverage.

---

1343 **Hazard terms**

---

1344 **Multi-hazards**

1345 multi-hazard OR "several hazards" OR "compound hazard!"

1346 **Drought**

1347 drought! OR dry spell!

1348 **Flood**

1349 flood! OR inundation! OR Glacial lake outburst

1350 **Storm**

1351 storm! OR superstorm! OR wind?storm! OR snow?storm! OR blizzard!

1352 OR derecho OR winter?storm! OR hail OR extra?tropical?storm OR

1353 thunderstorm! OR tornado! OR tropical?cyclone OR storm surge! OR

1354 hurricane! OR typhoon

1355 **Heatwave**

1356 heat?wave OR heat episode! OR ((heat OR hot) AND spell!) OR

1357 heat?stress

1358 **Coldwave**

1359 cold?wave! OR severe winter conditions OR cold spell

1360 **Mass movement**

1361 landslide! OR rock?fall OR mudslide OR mass movement

1362 **Wildfire**

1363 forest?fire! OR wild?fire! OR land?fire OR bush?fire

---

|                                                                                                                                                                                                                                                                                                                                                                                                                                                                                                                                                                                                                                                                                                                                                                                                   |      |
|---------------------------------------------------------------------------------------------------------------------------------------------------------------------------------------------------------------------------------------------------------------------------------------------------------------------------------------------------------------------------------------------------------------------------------------------------------------------------------------------------------------------------------------------------------------------------------------------------------------------------------------------------------------------------------------------------------------------------------------------------------------------------------------------------|------|
| <b>Impact terms</b>                                                                                                                                                                                                                                                                                                                                                                                                                                                                                                                                                                                                                                                                                                                                                                               | 1381 |
| impact! OR consequence! OR effect! OR damage! OR loss!                                                                                                                                                                                                                                                                                                                                                                                                                                                                                                                                                                                                                                                                                                                                            | 1382 |
| <b>Social</b>                                                                                                                                                                                                                                                                                                                                                                                                                                                                                                                                                                                                                                                                                                                                                                                     | 1383 |
| violen! OR crime! OR war! OR conflict! OR dispute! OR unemploy! OR poverty OR income                                                                                                                                                                                                                                                                                                                                                                                                                                                                                                                                                                                                                                                                                                              | 1384 |
| <b>Water availability</b>                                                                                                                                                                                                                                                                                                                                                                                                                                                                                                                                                                                                                                                                                                                                                                         | 1385 |
| "water scarcity" OR "water supply" OR "water availability" OR "lack of water" OR "hydrological stress" OR "drinking water" OR (water AND (chlorophyll OR nitrogen OR phosphorus OR quality OR pollution OR heavy metal! OR pesticide!)) OR algae?bloom                                                                                                                                                                                                                                                                                                                                                                                                                                                                                                                                            | 1386 |
| <b>Food production</b>                                                                                                                                                                                                                                                                                                                                                                                                                                                                                                                                                                                                                                                                                                                                                                            | 1387 |
| (food AND (security OR supply OR food production)) OR famine OR livestock OR cattle! OR (animal AND (well-being OR husbandry OR welfare OR nutrition)) OR fishery! OR aquaculture OR fish stock                                                                                                                                                                                                                                                                                                                                                                                                                                                                                                                                                                                                   | 1388 |
| <b>Health and wellbeing</b>                                                                                                                                                                                                                                                                                                                                                                                                                                                                                                                                                                                                                                                                                                                                                                       | 1389 |
| health! OR well?being OR ill OR illness OR disease! OR syndrome! OR infect! OR medical! OR disabilit! OR death! OR fatalit! OR died OR casualties OR "loss of life" OR injur! OR infectious disease! OR cholera OR giardiasis OR cryptosporidiosis OR leptospirosis OR "(obes! OR over?weight OR under?weight OR hunger OR stunting OR wasting OR undernourish! OR undernutrition OR anthropometr! OR malnutrition OR malnour! OR anemia OR anaemia OR ""micro?nutrient!"" OR diabet!)" OR mental OR depress! OR !stress! OR anx! OR ptsd OR psycho! OR psychiatric! OR !trauma! OR post-traumatic OR suicide! OR solastalg! OR "air quality" OR "air pollution" OR PM2.5 OR "fine particulate" OR asthma OR displacem! OR relocation! OR migration OR refugee! OR homeless! OR emergency shelter | 1390 |
| <b>Cities, settlement, and infrastructure</b>                                                                                                                                                                                                                                                                                                                                                                                                                                                                                                                                                                                                                                                                                                                                                     | 1391 |
| bridge! OR road! OR highway! OR train! OR transport! OR rail! OR ship OR mobility OR ((water OR waste?water) AND treatment plant!) OR sewage! OR sewer! OR sewerage! OR waste OR landfill OR ((water OR waste?water) AND treatment plant!) OR sewage! OR sewer! OR sewerage! OR waste OR landfill OR hospital! OR care clinic! OR emergenc! OR pharmac! OR digital infrastructure OR communication infrastructure OR ((mobile OR !phone OR internet) AND (network! OR system!)) OR energy OR electricity OR heating OR gas supply OR biogas OR ((wind OR hydro OR nuclear OR coal OR thermal) AND power) OR propert! OR house! OR building! OR infrastructure!                                                                                                                                    | 1392 |
| <b>Economic sectors</b>                                                                                                                                                                                                                                                                                                                                                                                                                                                                                                                                                                                                                                                                                                                                                                           | 1393 |
| (macroeconomic AND loss) OR economic assets OR capital OR companies OR business! OR industr! OR commerce OR crop! losses OR crop yield! OR crop quality OR crop failure OR yield loss! OR agriculture OR forest dieback OR forest damage OR tree vitality OR tree growth OR tree dieback OR forestry OR die?off OR tourism OR tourist! OR hotel! OR museum! OR culture OR cultural OR recreation!                                                                                                                                                                                                                                                                                                                                                                                                 | 1394 |

1427 **Table B4:** LLM prompts used to extract information on the inves-  
1428 tigated hazard, event dates, and affected locations. If the answer  
1429 to the first prompt is 0, the article is discarded. If the answer to  
1430 the second prompt is 0, the associated hazard event is discarded.  
1431 *hazardtype* refers to the hazard identified using the keyword-based  
1432 approach  
1433

---

1434 **Check if the study investigates a specific event**

---

1435 Using only information from the text above, answer the query.

1436 Query: Does the text refer to a study that addresses one or more climate hazard  
1437 events (i.e. it investigates the consequences of one or more events that happened  
1438 on specific dates and locations)? If yes, answer 1. If not, answer 0.

1439 Answer with either 1 or 0 and do not add extra text or notes.

---

1440 **Check if hazard detected with keyword-based search is investigated**

---

1441 Context information is below.

1442 Using only information from the text above and no previous knowledge, please  
1443 answer the query.

1444 Query: Did a *hazardType* event occur in the study area defined in the research,  
1445 and was it explicitly investigated as part of the study? Answer with 1 or 0. If  
1446 yes, answer 1. If not, answer 0.

1447 Answer with either 1 or 0 and do not add extra text or notes.

---

1448  
1449  
1450  
1451  
1452  
1453  
1454  
1455  
1456  
1457  
1458  
1459  
1460  
1461  
1462  
1463  
1464  
1465  
1466  
1467  
1468  
1469  
1470  
1471  
1472

|                                                                                                                                                      |      |
|------------------------------------------------------------------------------------------------------------------------------------------------------|------|
| <b>Extract hazard location</b>                                                                                                                       | 1473 |
| Context information is below.                                                                                                                        | 1474 |
| Using only information from the text above and no previous knowledge, please answer the query.                                                       | 1475 |
| Query: Where happened the <i>hazardType</i> event investigated in the study? For each unique country where the event occurred, extract, if possible: | 1476 |
| "country": Country affected by the <i>hazardType</i> event, mandatory field                                                                          | 1477 |
| "region": Regions within the country affected by the <i>hazardType</i> event                                                                         | 1478 |
| "state": States within the country affected by the <i>hazardType</i> event                                                                           | 1479 |
| "city": Cities within the country affected by the <i>hazardType</i> event                                                                            | 1480 |
| "locationAnnotation": Provide the text excerpt from where you extracted the location information                                                     | 1481 |
| If any of these information is missing from the text, leave the item empty. Do not add notes or extra text.                                          | 1482 |
| Provide the answer in JSON format.                                                                                                                   | 1483 |
| Here is an example of how the structure of the JSON must be:                                                                                         | 1484 |
| { "hazardLocation":                                                                                                                                  | 1485 |
| {                                                                                                                                                    | 1486 |
| "country": "China",                                                                                                                                  | 1487 |
| "region": "Guizhou Province",                                                                                                                        | 1488 |
| "state": "Shuicheng County",                                                                                                                         | 1489 |
| "city": "Liupanshui City",                                                                                                                           | 1490 |
| "locationAnnotation": "On July 23, 2019, a landslide occurred in Shuicheng County, Liupanshui City, Guizhou Province." }                             | 1491 |
| }                                                                                                                                                    | 1492 |
|                                                                                                                                                      | 1493 |
|                                                                                                                                                      | 1494 |
|                                                                                                                                                      | 1495 |
|                                                                                                                                                      | 1496 |
|                                                                                                                                                      | 1497 |
|                                                                                                                                                      | 1498 |
|                                                                                                                                                      | 1499 |
|                                                                                                                                                      | 1500 |
|                                                                                                                                                      | 1501 |
|                                                                                                                                                      | 1502 |
|                                                                                                                                                      | 1503 |
|                                                                                                                                                      | 1504 |
|                                                                                                                                                      | 1505 |
|                                                                                                                                                      | 1506 |
|                                                                                                                                                      | 1507 |
|                                                                                                                                                      | 1508 |
|                                                                                                                                                      | 1509 |
|                                                                                                                                                      | 1510 |
|                                                                                                                                                      | 1511 |
|                                                                                                                                                      | 1512 |
|                                                                                                                                                      | 1513 |
|                                                                                                                                                      | 1514 |
|                                                                                                                                                      | 1515 |
|                                                                                                                                                      | 1516 |
|                                                                                                                                                      | 1517 |
|                                                                                                                                                      | 1518 |

1519 **Extract hazard date**

---

1520 Using only information from the text above and no previous knowledge, please

1521 answer the query. Query: When did the *hazardType* event that affected *haz-*

1522 *ardLocation* investigated in the study happened? The date in which the hazard

1523 happened should be described by: "startYear": starting year, four numeric val-

1524 ues "YYYY"

1525 "startMonth": starting month, one or two numeric values "MM"

1526 "startDay": starting day, one or two numeric values "DD"

1527 "endYear": ending year, four numeric values "YYYY"

1528 "endMonth": ending month, one or two numeric values "MM"

1529 "endDay": ending day, one or two numeric values "DD"

1530 "hazardName": If the hazard received a special name, such as "Hurricane Har-

1531 vey" or "Storm Sandy", add it here, enclosed by double quotes

1532 If end year, end month, and end day are not mentioned in the text, repeat the

1533 values for start year, start month, and start day.

1534 Provide the answer in JSON format.

1535 If information is missing, leave it empty. Do not add notes or extra text.

1536 Here is an example of how the structure of the JSON must be:

1537 {"hazardDate": [{

1538 "startYear": "2017",

1539 "startMonth": "8",

1540 "startDay": "30",

1541 "endYear": "2017",

1542 "endMonth": "9",

1543 "endDay": "13",

1544 "hazardName": "Hurricane Irma" },

1545 {"startYear": "2017",

1546 "startMonth": "9",

1547 "startDay": "16",

1548 "endYear": "2017",

1549 "endMonth": "9",

1550 "endDay": "30",

1551 "hazardName": "Hurricane Maria" }] }

---

1552

1553

1554

1555

1556

1557

1558

1559

1560

1561

1562

1563

1564

**Table B5:** List of 39 studies annotated at the sentence level.  
These constitute the validation dataset used to evaluate model  
performance in the identification of reported impacts and their  
classification into one or more of the 31 impact classes.

| Title                                                                                                                                                     | Year | DOI                                        |
|-----------------------------------------------------------------------------------------------------------------------------------------------------------|------|--------------------------------------------|
| Social sensing of flood impacts in India: A case study of Kerala 2018                                                                                     | 2022 | 10.1016/<br>j.ijdr.2022.102908             |
| Maladaptation, fragmentation, and other secondary effects of centralized post-disaster urban planning: The case of the 2011 "cascading" disaster in Japan | 2021 | 10.1016/<br>j.ijdr.2021.102219             |
| Impact of the 2018 European drought on microbial groundwater quality in private domestic wells: A case study from a temperate maritime climate            | 2021 | 10.1016/<br>j.jhydrol.2021.126669          |
| Impact of heavy rains of 2018 in western Japan: disaster-induced health outcomes among the population of Innoshima Island                                 | 2020 | 10.1016/<br>j.heliyon.2020.e03942          |
| Factors associated with self reported mental health of residents exposed to Hurricane Harvey                                                              | 2019 | 10.1016/<br>j.pdisas.2019.100016           |
| Anatomy of the 2016 drought in the Northeastern United States: Implications for agriculture and water resources in humid climates                         | 2017 | 10.1016/<br>j.agrformet.2017.08.024        |
| Agricultural and food security impacts from the 2010 Russia flash drought                                                                                 | 2021 | 10.1016/<br>j.wace.2021.100383             |
| Brief communication: Critical infrastructure impacts of the 2021 mid-July western European flood event                                                    | 2022 | 10.5194/<br>nhess-22-3831-2022             |
| Heatwave fatalities in Australia, 2001–2018: An analysis of coronial records                                                                              | 2022 | 10.1016/<br>j.ijdr.2021.102671             |
| Severity of drought and heatwave crop losses tripled over the last five decades in Europe                                                                 | 2021 | 10.1088/<br>1748-9326/abf004               |
| Heatwave Damage Prediction Using Random Forest Model in Korea                                                                                             | 2020 | 10.3390/app10228237                        |
| Health impact analysis of PM2.5 from wildfire smoke in Canada (2013–2015, 2017–2018)                                                                      | 2020 | 10.1016/<br>j.scitotenv.2020.138506        |
| An overview of the impact of Hurricane Harvey on chemical and process facilities in Texas                                                                 | 2011 | 10.1061/<br>(ASCE)CF.1943-<br>5509.0000213 |
| Psychological impact of the hurricane Mitch in Nicaragua in a one-year perspective                                                                        | 2001 | 10.1007/s001270050298                      |
| A systematic assessment of the effects of extreme flash floods on transportation infrastructure and circulation: The example of the 2017 Mandra flood     | 2020 | 10.1016/<br>j.ijdr.2020.101542             |
| The 2022 Summer record-breaking heatwave and health information-seeking behaviours: an infodemiology study in Mainland China                              | 2023 | 10.1136/bmjgh-2023-<br>013231              |

**Table B5:** List of 39 studies annotated at the sentence level. These constitute the validation dataset used to evaluate model performance in the identification of reported impacts and their classification into one or more of the 31 impact classes.

| Title                                                                                                                                                               | Year | DOI                           |
|---------------------------------------------------------------------------------------------------------------------------------------------------------------------|------|-------------------------------|
| A cold wave of winter 2021 in central South America: characteristics and impacts                                                                                    | 2023 | 10.1007/s00382-023-06701-1    |
| Prenatal exposure to sand and dust storms and children's cognitive function in China: a quasi-experimental study                                                    | 2018 | 10.1016/S2542-5196(18)30068-8 |
| Effects of drought on freshwater ecosystem services in poverty-stricken mountain areas                                                                              | 2019 | 10.1016/j.gecco.2019.e00537   |
| The unprecedented spatial extent and intensity of the 2021 summer extreme heatwave event over the Western North American regions                                    | 2023 | 10.1016/j.wace.2023.100576    |
| The effects of the Australian bushfires on physical activity in children                                                                                            | 2023 | 10.1016/j.envint.2020.106214  |
| The Melbourne epidemic thunderstorm asthma event 2016: an investigation of environmental triggers, effect on health services, and patient risk factors              | 2018 | 10.1016/s2542-5196(18)30120-7 |
| Impact of fine particulate matter (PM2.5) smoke during the 2019 / 2020 Australian bushfire disaster on emergency department patient presentations                   | 2022 | 10.1016/j.joclim.2022.100113  |
| A multidisciplinary investigation of Storms Ciara and Dennis, February 2020                                                                                         | 2023 | 10.1016/j.ijdr.2023.103657    |
| From a drought to HIV: An analysis of the effect of droughts on transactional sex and sexually transmitted infections in Malawi                                     | 2022 | 10.1016/j.ssmph.2022.101221   |
| The impact of the 2014–2016 drought in Greater Letaba Local Municipality: How the farmers coped and factors that were significantly associated with loss of animals | 2020 | 10.1016/j.ijdr.2020.101869    |
| Impact of major earthquakes on the incidence of acute coronary syndromes – A systematic review of the literature                                                    | 2018 | 10.1016/j.hjc.2018.05.005     |
| Preparedness, Hurricanes Irma and Maria, and Impact on Health in Puerto Rico                                                                                        | 2022 | 10.1016/j.ijdr.2021.102657    |
| Storm Impact and Depression Among Older Adults Living in Hurricane Sandy-Affected Areas                                                                             | 2017 | 10.1017/dmp.2016.189          |
| After the Storm: Short-term and Long-term Health Effects Following Superstorm Sandy among the Elderly                                                               | 2019 | 10.1017/dmp.2018.152          |
| Assessing health impacts of the December 2013 Ice storm in Ontario, Canada                                                                                          | 2016 | 10.1186/s12889-016-3214-7     |



**Table B5:** List of 39 studies annotated at the sentence level.  
 These constitute the validation dataset used to evaluate model  
 performance in the identification of reported impacts and their  
 classification into one or more of the 31 impact classes.

| Title                                                                                                                 | Year | DOI                          |
|-----------------------------------------------------------------------------------------------------------------------|------|------------------------------|
| Brief communication: Critical infrastructure impacts of the 2021 mid-July western European flood event                | 2022 | 10.5194/nhess-22-3831-2022   |
| The impact of hurricane strikes on cruise ship and airplane tourist arrivals in the Caribbean                         | 2021 | 10.1177/13548166211037406    |
| Tree mortality following drought in the central and southern Sierra Nevada, California, U.S.                          | 2019 | 10.1016/j.foreco.2018.09.006 |
| Local Perception of Drought Impacts in a Changing Climate: The Mega-Drought in Central Chile                          | 2017 | 10.3390/su9112053            |
| Drought Impacts and Compounding Mortality on Forest Trees in the Southern Sierra Nevada                               | 2019 | 10.3390/f10030237            |
| Impacts of flood on health: epidemiologic evidence from Hanoi, Vietnam                                                | 2011 | 10.3402/gha.v4i0.6356        |
| Climate Change in Fisheries and Aquaculture: Analysis of the Impact Caused by Idai and Kenneth Cyclones in Mozambique | 2021 | 10.3389/fsufs.2021.714187    |

## 1703 Appendix C Annotation guidelines

### 1704 C.1 Event description: hazard type, location and date

1706 An event is a climate hazard event that occurs in one or more locations with infor-  
1707 mation available for at least the start or end year. Each event is characterized  
1708 by:

1710 **Hazard type:** Must be one of the following: drought, flood, storm, heat wave, cold  
1711 wave, mass movement or wildfire.

1712 **Location:** Specify the geographic location, including country, state, city, or any other  
1713 relevant place name.

1714 **Date:** Enter the start and end dates, including year, month, and day for each.

1715

### 1716 C.2 Classification of impact statements

1717 The main goal of this task is to accurately classify sentences based on the impacts  
1718 they report. Impacts are categorized into six main classes, each with its own set of  
1719 subclasses. This hierarchical structure ensures that the nuanced and diverse types of  
1720 impacts in scientific literature are appropriately captured.

1721

#### 1722 What you'll be doing as an annotator

- 1724 • Read the sentences: Review the provided sentences extracted from scientific papers.
- 1725 • Understand Context: Ensure you comprehend the context of the sentence to  
1726 correctly identify the type of impact it describes.
- 1727 • Classify the sentences: Assign the appropriate class and subclass based on the  
1728 sentence's content and the provided definitions for each category.
- 1729 • Annotate the sentences consistently: Follow the guidelines carefully to ensure  
1730 consistency across annotations.

1731 The main classes for annotating qualitative information are: economy, health,  
1732 society, agriculture/food, infrastructure and water.

1733

#### 1734 1. Society impacts (SOCIAL)

1735 These might include an increase in violence, crime rates, and conflicts. Hazards can  
1736 also incur losses of livelihood (e.g. by disrupting businesses, agriculture, industry and  
1737 reducing the number of job opportunities and/or income) and force people to relocate  
1738 temporarily or permanently.

1740 **Conflict (CFLC):** Extreme events can create social instability, including increased  
1741 crime, civil unrest, or conflicts over scarce resources like food and water. Inequitable  
1742 aid distribution can also lead to conflicts.

1743

1744 Example: Among Hurricane Sandy impact variables, injury during the storm, greater  
1745 number of storm stressors, and post-storm crime were associated with a higher prob-  
1746 ability of depression.

1747

1748

|                                                                                                                                                                                                                                                                                                                                                                                             |      |
|---------------------------------------------------------------------------------------------------------------------------------------------------------------------------------------------------------------------------------------------------------------------------------------------------------------------------------------------------------------------------------------------|------|
| <b><i>Loss of livelihood (LVLH):</i></b> Extreme events can disrupt businesses, agriculture, industry, affecting employment and income.                                                                                                                                                                                                                                                     | 1749 |
|                                                                                                                                                                                                                                                                                                                                                                                             | 1750 |
|                                                                                                                                                                                                                                                                                                                                                                                             | 1751 |
| Example: The population has plummeted over the years due to high unemployment rates and rising poverty levels as well as the lasting impact of Hurricane Maria.                                                                                                                                                                                                                             | 1752 |
|                                                                                                                                                                                                                                                                                                                                                                                             | 1753 |
|                                                                                                                                                                                                                                                                                                                                                                                             | 1754 |
| <b><i>Displacement, relocation, and migration (DISP):</i></b> The loss caused by extreme events can force people to relocate temporarily or permanently. Damage to the economy can prompt economic migration.                                                                                                                                                                               | 1755 |
|                                                                                                                                                                                                                                                                                                                                                                                             | 1756 |
|                                                                                                                                                                                                                                                                                                                                                                                             | 1757 |
|                                                                                                                                                                                                                                                                                                                                                                                             | 1758 |
| Example: At least 3000 inhabitants in the district became homeless from the hurricane.                                                                                                                                                                                                                                                                                                      | 1759 |
|                                                                                                                                                                                                                                                                                                                                                                                             | 1760 |
|                                                                                                                                                                                                                                                                                                                                                                                             | 1761 |
| <b><i>Inequalities (INEQ):</i></b> Extreme events can deepen existing social inequalities. Vulnerable populations may have limited access to resources, information, and services that are crucial for response, and recovery. Recovery efforts might favor more affluent groups, leaving vulnerable communities further disadvantaged.                                                     | 1762 |
|                                                                                                                                                                                                                                                                                                                                                                                             | 1763 |
|                                                                                                                                                                                                                                                                                                                                                                                             | 1764 |
|                                                                                                                                                                                                                                                                                                                                                                                             | 1765 |
|                                                                                                                                                                                                                                                                                                                                                                                             | 1766 |
| Example: The authors suggested that property damage and loss of services were greater contributors to adverse health following an extreme event among whites and individuals of high socioeconomic status, as they are more dependent on having easy access to health services and resources than low socioeconomic status groups that experienced more sporadic access prior to the event. | 1767 |
|                                                                                                                                                                                                                                                                                                                                                                                             | 1768 |
|                                                                                                                                                                                                                                                                                                                                                                                             | 1769 |
|                                                                                                                                                                                                                                                                                                                                                                                             | 1770 |
|                                                                                                                                                                                                                                                                                                                                                                                             | 1771 |
|                                                                                                                                                                                                                                                                                                                                                                                             | 1772 |
|                                                                                                                                                                                                                                                                                                                                                                                             | 1773 |
| <b>2. Impacts to water quality or quantity (WATER)</b>                                                                                                                                                                                                                                                                                                                                      | 1774 |
| Hazards can alter water availability directly (e.g. prolonged droughts can lead to depleted reservoirs and reduced groundwater recharge) or indirectly (e.g. storms can cause the contamination of water sources).                                                                                                                                                                          | 1775 |
|                                                                                                                                                                                                                                                                                                                                                                                             | 1776 |
|                                                                                                                                                                                                                                                                                                                                                                                             | 1777 |
| <b><i>Decreased water availability or access to water (AVLB):</i></b> Hazards can alter water availability directly (e.g. prolonged droughts can lead to depleted reservoirs and reduced groundwater recharge) or indirectly (e.g. earthquakes can damage water supply infrastructures). Decreased water availability increases the need for irrigation and for additional water sources.   | 1778 |
|                                                                                                                                                                                                                                                                                                                                                                                             | 1779 |
|                                                                                                                                                                                                                                                                                                                                                                                             | 1780 |
|                                                                                                                                                                                                                                                                                                                                                                                             | 1781 |
|                                                                                                                                                                                                                                                                                                                                                                                             | 1782 |
|                                                                                                                                                                                                                                                                                                                                                                                             | 1783 |
| Example: This extremely long span of water crisis forced people to refrain from using restrooms or exercising other sanitary activities.                                                                                                                                                                                                                                                    | 1784 |
|                                                                                                                                                                                                                                                                                                                                                                                             | 1785 |
|                                                                                                                                                                                                                                                                                                                                                                                             | 1786 |
| <b><i>Water quality (QUAL):</i></b> Disasters may damage water sources and lead to water contamination. Floods can cause the contamination of drinking water wells. Droughts can reduce water levels, concentrating pollutants. Storm surges can lead to saline intrusions.                                                                                                                 | 1787 |
|                                                                                                                                                                                                                                                                                                                                                                                             | 1788 |
|                                                                                                                                                                                                                                                                                                                                                                                             | 1789 |
|                                                                                                                                                                                                                                                                                                                                                                                             | 1790 |
|                                                                                                                                                                                                                                                                                                                                                                                             | 1791 |
| Example: In the Netherlands, there have been problems with waste deposits along the river banks, which is mostly the solid waste transported by the river from further                                                                                                                                                                                                                      | 1792 |
|                                                                                                                                                                                                                                                                                                                                                                                             | 1793 |
|                                                                                                                                                                                                                                                                                                                                                                                             | 1794 |

1795 upstream.

1796

1797

### 1798 **3. Impacts to food production (FOOD)**

1798 Direct or indirect damages to crops, by affecting soil fertility, promoting pests and  
1799 diseases, and damaging infrastructure. Hazards can also result in livestock productivity  
1800 losses and mortality and can negatively affect fish health and productivity.

1801

1802 ***Agriculture and crop production (AGRI)***: Disasters can damage crops directly  
1803 and indirectly by affecting soil fertility, promoting pests and diseases, and damaging  
1804 infrastructure. Droughts reduce crop yields and affect crop quality. Floods can drown  
1805 crops, wash away nutrients, and deposit debris and sediment, which can damage  
1806 crops. Excessive moisture can also promote fungal diseases.

1807

1808 Example: The timing and characteristics of the drought and heat wave were especially  
1809 damaging for both wheat crops.

1810

1811 ***Animal and livestock health and productivity (ANIM)***: Hazards often result  
1812 in livestock productivity losses and mortality. Heat stress, humidity, droughts, and  
1813 floods can cause physiological stress, reduce animal health and reproduction, and  
1814 ultimately, lower milk and meat production.

1815

1816 Example: After the drought, the average number of animals that farmers owned  
1817 dropped to 21.64 (SD = 18.51).

1818

1819 ***Fishery and aquaculture (FISH)***: Hazards can damage breeding habitats. Lower  
1820 oxygen levels due to droughts can stress or kill aquatic species. Heatwaves can cause  
1821 thermal stress, which can negatively affect fish health and productivity.

1822

1823 Example: The nation sustained tremendous damage to all the major sources of econ-  
1824 omy, including agriculture, forestry, and fishery, amounting to a loss of ¥1.09 trillion  
1825 (US\$9.86 billion).

1826

1827

### 1828 **4. Health impacts (HEALTH)**

1828 Besides physical injuries and fatalities, hazards can lead to an increase in the incidence  
1829 of infectious diseases, mental health issues, under-nutrition, and obesity rates (e.g.  
1830 excess respiratory-related cases associated with thunderstorms).

1831

1832 ***Infectious diseases (INFC)***: Disasters can lead to outbreaks of waterborne dis-  
1833 eases such as cholera, typhoid, and dysentery. The interruption of health care facilities  
1834 can lead to the spread of infections. Flooding and stagnant water can create breeding  
1835 grounds for mosquitoes, increasing the risk of vector-borne diseases like malaria,  
1836 dengue fever, and Zika virus.

1837

1838 Example: For example, work by Levy et al. (2016), which investigated the impact  
1839 of climate change on waterborne diseases noted that literature relating to drought

1840

|                                                                                                                                                                                                                                                                                                                                                                                                                                         |                                              |
|-----------------------------------------------------------------------------------------------------------------------------------------------------------------------------------------------------------------------------------------------------------------------------------------------------------------------------------------------------------------------------------------------------------------------------------------|----------------------------------------------|
| and disease was "particularly sparse" even when including all water exposures (i.e., surface water, groundwater etc.).                                                                                                                                                                                                                                                                                                                  | 1841<br>1842<br>1843                         |
| <b><i>Mortality (MORT):</i></b> Hazards cause fatalities directly through their immediate physical impacts. Fatalities can also happen due to long-term consequences to health and food insecurity.                                                                                                                                                                                                                                     | 1844<br>1845<br>1846<br>1847                 |
| Example: The flash flood caused 24 fatalities, rendering it the deadliest flood in Greece in the last 40 years (since the 1977 Athens disaster).                                                                                                                                                                                                                                                                                        | 1848<br>1849<br>1850                         |
| <b><i>Mental health (MIND):</i></b> Disasters can cause acute stress disorder, PTSD, trauma, depression, anxiety disorders, and substance use disorders.                                                                                                                                                                                                                                                                                | 1851<br>1852<br>1853                         |
| Example: The prevalence of depressive symptoms was significantly higher than the rate of 9.8% previously reported in NYC senior centersReference Berman and Furst31 (z=2.31, P=0.02).                                                                                                                                                                                                                                                   | 1854<br>1855<br>1856<br>1857                 |
| <b><i>Pregnancy and birth outcomes (PREG):</i></b> Disasters often interrupt access to regular healthcare services. Exposure to environmental contaminants can pose risks to both maternal and fetal health, potentially leading to congenital anomalies, preterm birth, and other adverse outcomes. Mental health issues during pregnancy are also linked to poor birth outcomes, including preterm birth and low birth weight.        | 1858<br>1859<br>1860<br>1861<br>1862<br>1863 |
| Example: Several studies show evidence that prenatal exposure to dust events significantly lowers birthweight, reduces gestational time, and increases infant mortality.7, 8                                                                                                                                                                                                                                                            | 1864<br>1865<br>1866                         |
| <b><i>Nutrition (NUTR):</i></b> Disasters can lead to malnutrition, starvation, undernutrition due to food insecurity, obesity, diet changes.                                                                                                                                                                                                                                                                                           | 1867<br>1868<br>1869                         |
| Example: Acute decompensation of heart failure after an earthquake was associated with higher blood pressure, interruption of drugs, inflammation, malnutrition, and fluid retention.                                                                                                                                                                                                                                                   | 1870<br>1871<br>1872<br>1873                 |
| <b><i>Skin diseases and allergies (SKIN):</i></b> Hazards can increase exposure to allergens, pollutants, and irritants. Floods and storms can lead to mold growth and spread of pollutants, triggering skin conditions like eczema and allergic reactions. Droughts and heatwaves can cause dry skin, making it more susceptible to infections and irritation, while wildfires release particulates that can aggravate skin allergies. | 1874<br>1875<br>1876<br>1877<br>1878<br>1879 |
| Example: And almost all dermatitis cases reported were diagnosed by the health staff after the flood.                                                                                                                                                                                                                                                                                                                                   | 1880<br>1881<br>1882                         |
| <b><i>Injuries and occupational health (OCC):</i></b> Hazards cause physical injuries from debris and unsafe structures. Droughts and heatwaves can lead to hazardous working conditions in agriculture due to dust, exacerbating occupational health risks.                                                                                                                                                                            | 1883<br>1884<br>1885<br>1886                 |

1887 Example: Additionally, injury had over a 2.2-fold increased risk for all time periods  
1888 following the storm, and effects 4 months (RR, 2.31; 95% CI, 2.30-2.32) and 12  
1889 months (RR, 2.30; 95% CI, 2.30-2.31) after the storm were greatest among women.

1890

1891 ***Respiratory, neurological, and cardiovascular (RESP):*** Both high and low  
1892 temperatures may lead to respiratory and cardiovascular diseases, strokes, and  
1893 myocardial infarction. Wildfire smoke is associated with respiratory diseases, such as  
1894 asthma and coughing.

1895

1896 Example: Our findings suggest that in addition to the immediate health effects, the  
1897 effects of hurricanes on health (CVD, respiratory disease, and injury) among the  
1898 elderly population can last for 1 year following the storm period., Subsequently, as  
1899 demonstrated in this study, wildfire smoke resulted in an increase in respiratory-  
1900 related patient presentations to the ED.

1901

1902 ***Other diseases/health outcomes (OTHER):*** Hazards can lead to a variety of  
1903 health issues, such as chronic health conditions. This class includes articles which do  
1904 not mention specifically the type of health impact.

1905

1906 Example: One recent study in the US Virgin Islands<sup>29</sup> found that older adults and  
1907 people with chronic disease faced the most adverse health impacts of Hurricanes Irma  
1908 and Maria.

1909

1910

## 1911 **5. Impacts to social and critical infrastructure (INFRA)**

1912 Widespread physical damage to transportation, water, sanitation, healthcare, IT, com-  
1913 munication, residential, social, energy, and gas infrastructure, along with supply chain  
1914 disruptions and reduced energy production.

1915 ***Physical damage to transportation infrastructure (TRSP):*** Hazards can  
1916 cause direct damage to roads, bridges, railways, highways.

1917

1918 Example: FEMA lost visibility of about 38% of its commodity shipments to Puerto  
1919 Rico, worth an estimated \$257 million.

1920

1921 ***Disruption of supply chains (SUPPLY):*** Hazards often damage infrastructure  
1922 and transportation routes, which can disrupt logistics and cause delays. Droughts can  
1923 impact agricultural production, leading to shortages.

1924

1925 Example: Imports will be necessary to fund the production chain. The sugar-energy  
1926 sector had also already accumulated losses due to drought since 2021.

1927

1928 ***Physical damage to water, sanitation and hygiene infrastructure (SANIT):***

1929 Water storage and supply, waste disposal and collection, wastewater collection and  
1930 treatment, urban and rural drainage systems.

1931

1932

|                                                                                                                                                                                                                                                                                    |      |
|------------------------------------------------------------------------------------------------------------------------------------------------------------------------------------------------------------------------------------------------------------------------------------|------|
| Example: Adding to the difficulty, the sewerage pipelines were extensively damaged during the disaster, which further made victims avoid restrooms.                                                                                                                                | 1933 |
|                                                                                                                                                                                                                                                                                    | 1934 |
|                                                                                                                                                                                                                                                                                    | 1935 |
| <b><i>Physical damage or strain on healthcare infrastructure (STRAIN):</i></b>                                                                                                                                                                                                     | 1936 |
| Difficulty of access. Adverse health outcomes associated with hazards can create pressure on health systems (e.g. by increasing the number of hospitalizations) and increase costs for health workers.                                                                             | 1937 |
|                                                                                                                                                                                                                                                                                    | 1938 |
|                                                                                                                                                                                                                                                                                    | 1939 |
|                                                                                                                                                                                                                                                                                    | 1940 |
| Example: In addition, in tsunami-stricken areas, the damage of catheterization laboratories resulted in reduction in percutaneous coronary interventions (PCI) and increase in in-hospital mortality compared to the inland areas.                                                 | 1941 |
|                                                                                                                                                                                                                                                                                    | 1942 |
|                                                                                                                                                                                                                                                                                    | 1943 |
|                                                                                                                                                                                                                                                                                    | 1944 |
| <b><i>Physical damage to IT and communication (IT):</i></b> Disasters can impact data centers and communication towers, leading to equipment failure. They can damage cables and electronic systems through, disrupting critical communication networks and IT operations.         | 1945 |
|                                                                                                                                                                                                                                                                                    | 1946 |
|                                                                                                                                                                                                                                                                                    | 1947 |
|                                                                                                                                                                                                                                                                                    | 1948 |
|                                                                                                                                                                                                                                                                                    | 1949 |
| Example: This was primarily due to flooded telecommunication infrastructure in the direct vicinity of flooded houses.                                                                                                                                                              | 1950 |
|                                                                                                                                                                                                                                                                                    | 1951 |
|                                                                                                                                                                                                                                                                                    | 1952 |
| <b><i>Physical damage to residential buildings (RESI):</i></b> Disasters cause direct impact to buildings where people live or stay regularly.                                                                                                                                     | 1953 |
|                                                                                                                                                                                                                                                                                    | 1954 |
|                                                                                                                                                                                                                                                                                    | 1955 |
| Example: Catastrophic flooding associated with the storm displaced >30,000 people to evacuation shelters and flooded >135,000 homes and 1 million cars, making the storm both physically devastating and emotionally traumatizing [37–40].                                         | 1956 |
|                                                                                                                                                                                                                                                                                    | 1957 |
|                                                                                                                                                                                                                                                                                    | 1958 |
|                                                                                                                                                                                                                                                                                    | 1959 |
| <b><i>Physical damage to social infrastructure (PUBL):</i></b> Disasters cause direct impact to buildings owned by the government or the public, such as city halls, schools, libraries, churches and post offices.                                                                | 1960 |
|                                                                                                                                                                                                                                                                                    | 1961 |
|                                                                                                                                                                                                                                                                                    | 1962 |
|                                                                                                                                                                                                                                                                                    | 1963 |
| Example: There are several explanations for these observations. First, the damage to the social infrastructure, including health facilities such as cardiac catheterization laboratories, means that patients needing such interventions may have delayed diagnosis and treatment. | 1964 |
|                                                                                                                                                                                                                                                                                    | 1965 |
|                                                                                                                                                                                                                                                                                    | 1966 |
|                                                                                                                                                                                                                                                                                    | 1967 |
|                                                                                                                                                                                                                                                                                    | 1968 |
| <b><i>Physical damage to energy and gas infrastructure or reduced energy production (ENER):</i></b>                                                                                                                                                                                | 1969 |
| Disasters can destroy power plants and pipelines, damage electrical grids and gas facilities. For example, droughts can reduce water levels for hydropower or nuclear generation, impacting overall energy production.                                                             | 1970 |
|                                                                                                                                                                                                                                                                                    | 1971 |
|                                                                                                                                                                                                                                                                                    | 1972 |
|                                                                                                                                                                                                                                                                                    | 1973 |
|                                                                                                                                                                                                                                                                                    | 1974 |
| Example: The power supply collapsed, the entire building technology was destroyed and some 300 patients had to be evacuated by helicopter.                                                                                                                                         | 1975 |
|                                                                                                                                                                                                                                                                                    | 1976 |
|                                                                                                                                                                                                                                                                                    | 1977 |
|                                                                                                                                                                                                                                                                                    | 1978 |

1979 **6. Economic losses (ECONOMY)**

1980 Economic losses for one or more of the following sectors: industry and commerce,  
1981 agriculture, forestry, recreation, tourism and culture.

1982 ***Industry and commerce (INDS):*** Disasters can halt production, damage inven-  
1983 tory and cause natech accidents.  
1984

1985 Example: Seven Natechs occurred in Jefferson County around the Port Arthur and  
1986 Port Neches, where the maximum accumulated rainfall exceeded 1270 mm (50 inches).  
1987

1988 ***Agriculture (AGRC):*** Disasters can impact agricultural profitability.  
1989

1990 Example: First, droughts can generate economic shocks for individuals whose primary  
1991 income source is agriculture, by affecting agricultural outputs.  
1992

1993 ***Forestry (FRST):*** Disasters can impact forestry profitability.  
1994

1995 Example: First-ever or extremely rare frosts in the Chiquitania and Pantanal regions,  
1996 between latitudes 16 S and 19 S, contributed to vegetation drying (and dying) in the  
1997 context of an ecosystem (Chiquitano dry forest) already debilitated by the wildfires  
1998 of previous years.  
1999

2000 ***Recreation, tourism and culture (RECR):*** Hazards can damage attractions  
2001 and recreational facilities. Droughts and heat waves may reduce outdoor activity  
2002 and visitation. Wildfires can destroy natural landscapes and cultural heritage sites,  
2003 leading to decreased tourism.  
2004

2005 Example: Water supply issues in Monmouthshire and travel to key sporting fixtures  
2006 in Wales were impacted resulting in further losses which resonate with the increasing  
2007 socioeconomic impacts resulting from more frequent high magnitude storms caused  
2008 by climate change.  
2009

2010 ***General economic losses (ECOG):*** Overall financial impact of an event or dis-  
2011 aster on an area or system.  
2012

2013 Example: During the winter storms of 2013/14 alone, the UK government estimated  
2014 England and Wales alone sustained economic losses of £1.3bn.  
2015

2016  
2017  
2018  
2019  
2020  
2021  
2022  
2023  
2024
